# Supplementary material
Source: PubMed Central journal article supplement (PMC3135681)
Supplement: NIHMS272486-supplement-supplement_1.pdf [file NIHMS272486-supplement-supplement_1.pdf]

1  
2  
3  
4  
5  
6  
7  
8  
9  
10  
11  
12  
13  
14  
15  
16  
17  
18  
19  
20  
21  
22  
23  
24  
25  
26  
27  
28  
29  
30  
31  
32  
33  
34  
35  
36  
37  
38  
39  
40  
41  
42  
43  
44  
45  
46  
47  
48  
49  
50  
51  
52  
53  
54  
55  
56  
57  
58  
59  
60  
61  
62  
63  
64  
65

**ACKNOWLEDGEMENTS**

Special thanks to the patients and their families for participation in the study. We would also like to thank Jennifer Graf from the NIH dietary and nutrition department for performing anthropometric evaluations on patients.

**Supplemental Digital Content Legend:**

Supplemental Digital Content 1 (Table). Characteristics of all study patients, patients with CAA and patients without abnormalities.

**Table SDC 1:** Characteristics of all study patients, patients with CAA and patients without abnormalities.

|                                    | <b>All</b>    | <b>CAA<sup>a</sup></b> | <b>No CAA</b>  |
|------------------------------------|---------------|------------------------|----------------|
|                                    | N = 27        | N = 14                 | N = 13         |
| <b>General Characteristics:</b>    |               |                        |                |
| Age (yrs)                          | 18.9 ± 3.4    | 17.7 ± 2.6             | 20.1 ± 3.8     |
| % Male                             | 41%           | 50%                    | 31%            |
| % White                            | 37%           | 28%                    | 46%            |
| % African American                 | 44%           | 50%                    | 38%            |
| CD4 count (cells/mm <sup>3</sup> ) | 652 ± 380     | 676 ± 352              | 626 ± 421      |
| Viral load (copies/ml)             | 24880 ± 93562 | 6748 ± 16792           | 44406 ± 133659 |
| % Undetectable Viral Load          | 70%           | 79%                    | 62%            |
| <b>Cardiac Risk factors:</b>       |               |                        |                |
| History of smoking (%)             | 18%           | 29%                    | 8%             |
| Systolic Blood Pressure (mmHg)     | 119 ± 15      | 122 ± 14               | 115 ± 16       |
| Diastolic Blood Pressure (mmHg)    | 71 ± 9        | 74 ± 8                 | 68 ± 10        |
| Triglycerides (mg/dL)              | 154 ± 173     | 137 ± 132              | 173 ± 213      |
| Total Cholesterol (mg/d)           | 152 ± 38      | 158 ± 40               | 145 ± 36       |
| LDL (mg/dL)                        | 85 ± 27       | 91.7 ± 25.6            | 78 ± 27        |
| HDL (mg/dL)                        | 45 ± 14       | 45 ± 13                | 45 ± 14        |
| BMI (kg/m <sup>2</sup> )           | 22.6 ± 3.6    | 23.2 ± 4.0             | 21.9 ± 3.1     |
| Waist to hip ratio                 | 0.92 ± .08    | 0.92 ± .07             | 0.92 ± .09     |
| <b>Antiretroviral Exposure</b>     |               |                        |                |
| Years on ARV                       | 15.0 ± 2.9    | 15.2 ± 2.7             | 14.7 ± 3.2     |
| Zidovudine years                   | 6.5 ± 4.4     | 6.8 ± 4.4              | 6.2 ± 4.6      |
| Abacavir years                     | 1.7 ± 2.8     | 2.0 ± 3.0              | 1.4 ± 2.6      |

|                                  |            |            |             |
|----------------------------------|------------|------------|-------------|
| Tenofovir years <sup>b</sup>     | 1.6 ± 2.1  | 2.3 ± 2.1  | 0.84 ± 1.95 |
| Emtricitabine years <sup>b</sup> | 0.8 ± 1.3  | 1.2 ± 1.6  | .29 ± .74   |
| PI years                         | 10.1 ± 2.8 | 10.1 ± 2.4 | 10.0 ± 3.3  |

Inflammatory markers:

|                      |             |             |             |
|----------------------|-------------|-------------|-------------|
| CRP (mg/dL)          | 0.22 ± 0.33 | 0.29 ± 0.41 | 0.12 ± 0.14 |
| D-Dimer (mg/dL)      | 0.34 ± 0.19 | 0.32 ± 0.11 | 0.37 ± 0.25 |
| Homocysteine (mg/dL) | 6.3 ± 1.9   | 6.1 ± 1.6   | 6.5 ± 2.1   |
| Pro BNP (mg/dL)      | 52.9 ± 59.4 | 31.4 ± 21.9 | 76.3 ± 77.4 |

<sup>a</sup> CAA = Coronary Artery Abnormality greater than mild on cardiac MRI

<sup>b</sup> p < .05 for difference between CAA and no CAA

Values present are mean ± SD unless otherwise indicated
